# Corrections

## *Kinetics of calcium mobilisation and inositol phosphate metabolism in endotoxin-stimulated HL-60 cells*

By JIAMIN QU, H. ANNE LEAVER,  
PENG LEE YAP and NORMAN H. WILSON

Volume 19 No. 2 (1991)

p. 95S. We regret that we are unable to reproduce the results described in Fig. 1B of the above communication, which reported an effect of endotoxin on intracellular  $\text{Ca}^{2+}$  in HL-60 cells. We therefore would like to retract the results described in Fig. 1B, and the subsequent description of  $\text{Ca}^{2+}$  mobilisation in response to endotoxin.

## *Recombinant human granulocyte colony stimulating factor (rhG-CSF) and superoxide production in a haematopoietic cell line*

By WILLIAM S. GILMORE, B. M. HANNIGAN,  
S. J. EASON, C. P. MCGUCKIN and  
A. A. NELSON

Volume 19 No. 2 (1991)

p. 237S. Table 1 should read:

Production of superoxide by U937 cells

| Stimulant     | Superoxide (nmoles/min/ $10^6$ cells) |
|---------------|---------------------------------------|
| PMA           | 0.027                                 |
| PMA + rhG-CSF | 0.022                                 |
| rhG-CSF       | 0.014                                 |

## *Extraction of the intact form of type IX collagen from mammalian vitreous*

By PAUL N. BISHOP, DAVID McLEOD and  
SHIRLEY AYAD

Volume 19 No. 4 (1991)

p. 351S. Further work (which was presented at the 639th meeting of the Biochemical Society) has demonstrated that the predominant form of  $\alpha 2(\text{IX}) + \text{GAG}$  has an  $M_r$  of 80 000–120 000 (the GAG therefore being similar to that found on the bovine cartilage  $\alpha 2(\text{IX})$  chain with a polydisperse  $M_r$  of approx. 15 000–55 000).
